# Supplementary material for: Well-defined 2D transition vanadium pentoxide (V2O5) flat nanorods with large-scale synthesis feasibility as an electrocatalyst for the oxygen evolution reaction (OER)
Source: Royal Society of Chemistry journal article supplement (doi:10.1039/d3ya00100h), 2023-01-01
Supplement: d3ya00100h1.pdf [file d3ya00100h1.pdf]

Supplementary File

**Well Defined 2D Transition Vanadium Pentoxide ( $V_2O_5$ ) Flat nanorods with Large-Scale Synthesis Feasibility as an Electrocatalyst for Oxygen Evolution Reaction (OER)**

*Veena Mounasamy, Ganesan Srividhya, Nagamony Ponpandian\**

Department of Nanoscience and Technology, Bharathiar University, Coimbatore 641046, India

\*Corresponding Author: e-mail: [Ponpandian@buc.edu.in](mailto:Ponpandian@buc.edu.in); Tel.: +91-422-2428421

**S1 - Supplementary Data 1**

Through field-emission scanning electron microscopy (fe-sem), the voids have been observed in between flat nanorods. The voids are marked and shown in **fig. S1** below.

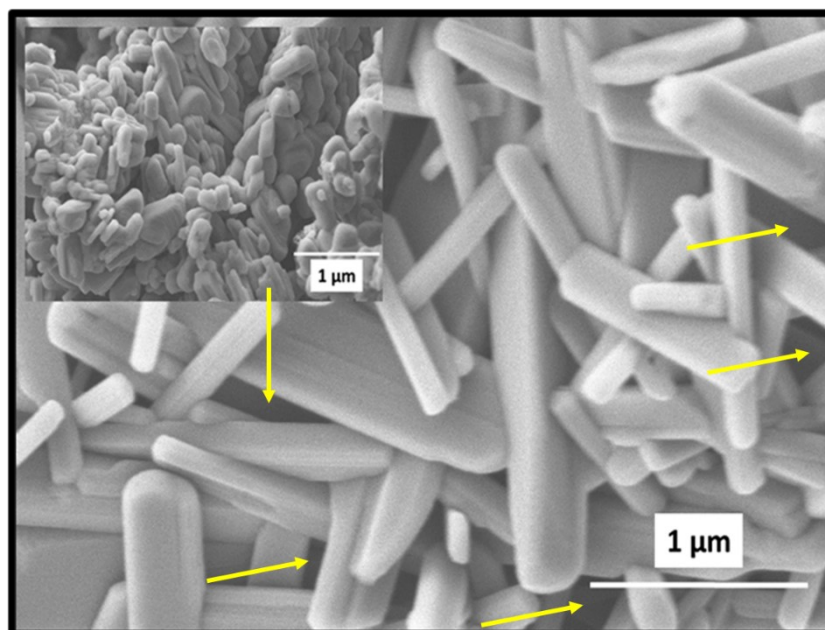

**Fig. S1:  $V_2O_5$  flat nanorods with voids**
